# Supplementary material for: COVID-19 and Respiratory Virus Co-Infections: A Systematic Review of the Literature
Source: MDPI journal article supplement (doi:10.3390/v15040865), 2023-03-28
Supplement: s1 [file s1]

**Supplementary File S1.** Articles reporting SARS-CoV-2 and influenza virus co-infections (as of April 12, 2022).

| <b>Study / country</b>       | <b>Time period</b> | <b>Number of co-infected cases / Characteristics</b>                                                                                                   | <b>Findings</b>                                                                                                                                                                                                                                      | <b>Management / Outcome</b>                                                                                                                                                                   |
|------------------------------|--------------------|--------------------------------------------------------------------------------------------------------------------------------------------------------|------------------------------------------------------------------------------------------------------------------------------------------------------------------------------------------------------------------------------------------------------|-----------------------------------------------------------------------------------------------------------------------------------------------------------------------------------------------|
| Kondo et al [9] /Japan       | 2020               | 57-year-old male with COVID-19 and influenza<br><br>Comorbidities: DM, vasospastic angina                                                              | 1 <sup>st</sup> fever and cough<br>2 <sup>nd</sup> SOB, anosmia, ageusia, fever<br>1 <sup>st</sup> CT: GGO in the left lung<br>2 <sup>nd</sup> CT: peripheral, bilateral, GGO with consolidation and intralobular lines                              | 1 <sup>st</sup> garenoxacin<br>2 <sup>nd</sup> azithromycin, meropenem, favipiravir<br>Hospitalization: yes<br>Oxygen: yes<br>Intubation: no<br>Discharge: yes                                |
| Khodamoradi et al [10] /Iran | 2020               | 4 cases (30% of 12 COVID-19 patients)<br>1 female (74 years)<br>3 males (40, 64, 50 years)<br>Comorbidities: 1. ischemic cerebrovascular accident, HTN | Fever (4), dyspnea (4), dry cough (3), malaise (2), body pain (2), headache (3), orthopnea (2), anorexia cough, sweating, chills, severe compressive chest pain, diarrhea, respiratory distress<br>CXR: bilateral infiltrates (4)<br>Influenza A (4) | NA<br>Hospitalization: 4<br>Oxygen: NA<br>Intubation: NA<br>Unknown outcome: 4                                                                                                                |
| Hashemi et al [11] / Iran    | 2020               | 23 cases (22.3% of 105 dead COVID-19 patients)                                                                                                         | Influenza A: 18 cases (78.3%)<br>Influenza B: 5 cases (21.7%)<br>Also, RSV and bocavirus in 9.7% of SARS-CoV-2 positive dead cases, parainfluenza viruses in 3.9%, hMPV in 2.9%, and adenovirus in 1.9%.                                             | Death: 23(100%)                                                                                                                                                                               |
| Huang et al [12] / Taiwan    | 2020               | One 48-y.o. woman<br><br>No comorbidities                                                                                                              | Fever, dry cough, sore throat, myalgia, fatigue<br>CT: clear at admission<br>1 <sup>st</sup> CXR bilateral pneumonia patches<br><br>Influenza B                                                                                                      | oseltamivir, baloxavir<br>ceftriaxone, azithromycin<br>hydroxychloroquine<br>Hospitalization: 1<br>Oxygen: NA<br>Intubation: NA<br>Discharge: 1                                               |
| Singh et al [13] /USA        | 2020               | 3 cases<br>Mean age: 59.2 years (range: 41-71 years)<br>1 male, 2 females<br><br>Comorbidities: HTN, DM                                                | Cough, fever, SOB, myalgia<br><br>CXR: bilateral patchy infiltrates<br><br>CT: diffuse scattered GGOs, multi-lobe infiltrates<br>RADT: influenza A (1), influenza B (2)<br>PCR: SARS-CoV-2                                                           | oseltamivir (3)<br>hydroxychloroquine (3)<br>azithromycin (3) ceftriaxone (3) tocilizumab (1)<br>convalescent plasma (1)<br>Hospitalization: 3<br>Oxygen: NA<br>Intubation: 2<br>Discharge: 3 |
| Sang et al [14] / USA        | 2020               | One 58-y.o. woman<br>Comorbidities: RA, ILD, COPD, HTN                                                                                                 | Fever, respiratory distress<br>Complication: ARDS, cardiomyopathy (autopsy)<br>PCR: Influenza A, SARS-CoV-2                                                                                                                                          | Oseltamivir, antibiotics<br>Hospitalization: 1<br>Oxygen: 1<br>Intubation: 1<br>Death: 1                                                                                                      |

|                               |                             |                                                                                                                                                                                                                                     |                                                                                                                                                                                                                                                                                                                                                                                                               |                                                                                                                                                |
|-------------------------------|-----------------------------|-------------------------------------------------------------------------------------------------------------------------------------------------------------------------------------------------------------------------------------|---------------------------------------------------------------------------------------------------------------------------------------------------------------------------------------------------------------------------------------------------------------------------------------------------------------------------------------------------------------------------------------------------------------|------------------------------------------------------------------------------------------------------------------------------------------------|
| Swets et al [15] / UK         | February 2020-December 2021 | 583 (8.4%) of 6965 SARS-CoV-2 patients with viral co-infection: 227 influenza, 220 RSV, and 136 adenoviruses                                                                                                                        | NA                                                                                                                                                                                                                                                                                                                                                                                                            | Hospitalization: 583<br>Intubation: NA<br>Oxygen: NA<br>Unknown outcome: 583<br>Influenza co-infection: increased risk of intubation and death |
| Liu et al [25] / China        | 2019-2020                   | Hospitalized children with LRTIs tested for RSV, adenovirus, parainfluenza 1,2,3, influenza A and B, hMPV, rhinovirus<br><br>7107 patients (4600 in 2019 and 2507 in 2020)<br><br>Median age: 14 months in 2019 vs 2 months in 2020 | 2019 vs 2020: RSV (6.6% vs 4.5%), adenovirus (2.9% vs 0.2%), influenza A (1.3% vs 0.4%), influenza B (0.7% vs 0.2%), parainfluenza 1 (0.8% vs 0.2%), parainfluenza 3 (3.8% vs 2.1%), hMPV (0.6% vs 0.2%), rhinovirus (7.4% vs 11%).<br>Overall positivity: 23.3% in 2019 vs 18.3% in 2020                                                                                                                     | NA<br><br>Length of stay: median 7 vs 9 days (<0.001).<br>No difference in ICU admission and mortality                                         |
| Fujita et al [27] / Brazil    | 2021-2022                   | Rates of SARS-CoV-2 and influenza co-infection: Sao Paulo: 110/205 (53.6%); Bahia: 11/185 (5.9%); Pernambuco: 31/179 (17.3%); Parana: 0/75 (0%); Rio de Janeiro: 2/4,752 (0%); Amazonas: 0/494 (0%)                                 | NA                                                                                                                                                                                                                                                                                                                                                                                                            | NA                                                                                                                                             |
| Yue et al [34] / Wuhan, China | January - February 2020     | 179 cases (57.3% of 307 COVID-19 patients)                                                                                                                                                                                          | Most patients had typical COVID-19 (fever and cough) regardless of influenza infection<br>Influenza A co-infection: lighter disease, higher lymphocytes and eosinophils, less often chest CT abnormalities<br>Influenza B co-infection: more severe disease: fatigue (13%), chest CT abnormalities: (100%), lower lymphocytes/eosinophils<br>Influenza A: 49.8%; Influenza B: 7.5% early co-infected patients | Same treatment for all<br><br>Prognosis:<br>COVID-19 only: 7.6%<br>Influenza A co-infection: 5.9%<br>Influenza B co-infection: 30.4%           |
| Maa et al [35] / Wuhan, China | NA                          | 46 cases (49.5% of 93 COVID-19 patients)                                                                                                                                                                                            | Survivors: fever 73.9%, fatigue 30.4%<br>Non-survivors: fever 72.7%<br>Complications: survivors: cardiac injury 86.4%                                                                                                                                                                                                                                                                                         | NA<br>Hospitalization: 46<br>Oxygen: NA<br>Intubation: NA<br>Discharge: 24                                                                     |

|                                  |                      |                                                                                                                                                                                    |                                                                                                                                                                                                                                                                                                                                                                      |                                                                                                                                                                                      |
|----------------------------------|----------------------|------------------------------------------------------------------------------------------------------------------------------------------------------------------------------------|----------------------------------------------------------------------------------------------------------------------------------------------------------------------------------------------------------------------------------------------------------------------------------------------------------------------------------------------------------------------|--------------------------------------------------------------------------------------------------------------------------------------------------------------------------------------|
|                                  |                      |                                                                                                                                                                                    | non-survivors: higher WBCs, neutrophil count, creatinine levels, D-dimers, and TNF $\alpha$<br>Influenza A: 44 (47.3%)<br>Influenza B: 2 (2.2%)                                                                                                                                                                                                                      | Death: 22                                                                                                                                                                            |
| Cheng et al [36] /Beijing, China | January - March 2020 | 97 cases (45.5% of 213 COVID-19 patients)<br><br>Median age: 61 y.o.                                                                                                               | All: fever, cough, dyspnea, expectoration, GI symptoms<br><br>Influenza A: 97 (100%)                                                                                                                                                                                                                                                                                 | Hospitalization: 97<br>Oxygen: N/A<br>Intubation: N/A<br>Discharge: 97<br>Influenza no effect on outcome                                                                             |
| Zheng et al [37] /Wuhan, China   | January 2020         | 4 cases<br>Mean age: 35 years (range: 15-62 years)<br><br>Comorbidities: malignancy                                                                                                | Fever and cough (3)<br><br>Prolonged fever (24 days), oxygen therapy (1)<br><br>H3N2: (1), B/Victoria: (3)                                                                                                                                                                                                                                                           | Oseltamivir and/or antibiotics<br>Hospitalization: 1<br>Oxygen: 1<br>Intubation: 0<br>Discharge: 1                                                                                   |
| Miatechet al [38] / USA          | March – April 2020   | 4 cases (4.9% of 81 COVID-19 patients)<br>Mean age: 61.5 years (range: 58-66 years)<br>2 males, 2 females<br><br>Comorbidities (3): DM (3), HTN (3), obesity (3), HF (1), ESRD (1) | Fever (4), cough (3), SOB (2), myalgia (2), diarrhea (1), malaise (1), dyspnea (1)<br>CXR: infiltrate (2), mild vascular congestion (1), patchy diffuse bilateral infiltrates (1), streaky opacities bilaterally (1)<br><br>PCR: SARS-CoV-2 (4)<br>RADT: Influenza A (2) and B (2)                                                                                   | azithromycin(1)<br>levofloxacin (2)<br>vancomycin (2)<br>metronidazole(1)<br>augmentin(1)<br>oseltamivir (1)<br><br>Hospitalization: 3<br>Oxygen: 1<br>Intubation: 1<br>Discharge: 3 |
| Konala et al [39] / USA          | NA                   | 3 cases<br>Ages: 35, 57, 68 y.o.<br>1 male, 2 females<br><br>Comorbidities in 2 cases: DM (2), HTN (2), MI (1), CKD (1)                                                            | Fever (2), myalgia (1), cough (2), SOB (3) headache (2), sore throat (1), respiratory distress (2), diarrhea (2), altered mental status (1)<br>CXR: bilateral alveolar infiltrates (1), bilateral pleural effusions (1), air space opacities bilaterally (1), congestion (1)<br>CT: patchy bilateral GGOs (1), bilateral scattered infiltrates (2)<br>Influenza A: 3 | azithromycin (3)<br>oseltamivir (2)<br>ceftriaxone (3)<br>hydroxychloroquine (3)<br>Hospitalization: 3<br>Oxygen: 1<br>Intubation: 1<br>Discharge: 2<br>Death: 1                     |
| Ding et al [40] / Wuhan, China   | NA                   | 5 cases (4.3% of 115 COVID-19 patients)<br>Mean age: 50.2 years (range: 39-66 years)<br>2 males, 3 females<br><br>Comorbidities in 5 cases: HTN (2), CVD (1), Ca (1)               | Fever (5), cough (5), SOB (5), myalgias (2), fatigue (2), headache (2), expectoration (2), pharyngeal pain (3)<br><br>Complications: ARDS (1), acute liver injury (3)<br>Remission of CT findings<br>Mean hospitalization: 25.6 days                                                                                                                                 | antibiotics (5)<br>oseltamivir (5)<br>other antivirals (5)<br>glycosteroids(3)<br>Hospitalization: 5<br>Oxygen: 5<br>Intubation: 0<br>Discharge: 5                                   |

|                                          |                         |                                                                                                                              |                                                                                                                                                                                                                                                                                                                      |                                                                                                                                                                    |
|------------------------------------------|-------------------------|------------------------------------------------------------------------------------------------------------------------------|----------------------------------------------------------------------------------------------------------------------------------------------------------------------------------------------------------------------------------------------------------------------------------------------------------------------|--------------------------------------------------------------------------------------------------------------------------------------------------------------------|
|                                          |                         |                                                                                                                              | (range: 16-39 days)                                                                                                                                                                                                                                                                                                  |                                                                                                                                                                    |
| Wu et al [41]<br>/Beijing, China         | January<br>2020         | One 69 y.o. case<br><br>Comorbidities: (-)                                                                                   | Severe hypoxemia<br>Complications: ARDS<br><br>CT: bilateral, mass, GGOs<br>CXR: diffuse exudative shadows<br>in bilateral lungs<br><br>BAL: positive for SARS-CoV-2<br>Influenza A                                                                                                                                  | oseltamivir (1)<br><br>Hospitalization: 1<br>Oxygen: 1<br>Intubation: 1<br>Discharge: 1                                                                            |
| Xiang et al<br>[42] / Wuhan,<br>China    | NA                      | 2 cases (1.4 % of 145<br>COVID-19 patients)<br>1 male 41 y.o., 1 female<br>34 y.o.<br><br>Comorbidities in 1 case            | Fever (1), cough (2), dyspnea<br>(1), myalgia (2), fatigue (2)<br><br>Complications: hypoxemia (1)<br><br>CXR: abnormal (2)                                                                                                                                                                                          | oseltamivir (2)<br>other antivirals (2)<br>antibiotics (2)<br><br>Hospitalization: 2<br>Oxygen: 1<br>Intubation: 0<br>Discharge: 2                                 |
| Cuadrado-<br>Payán et al<br>[43] / Spain | NA                      | 4 cases<br>Mean age: 67 years<br>(range: 53-81 years)<br>3 males, 1 female<br><br>Comorbidities: HTN<br>(4), DM (2), CKD (2) | Fever (4), dyspnea (4),<br>non-productive cough (4),<br>bronchospasm (3), low oxygen<br>saturation (3)<br><br>CXR: bilateral infiltrates (1),<br>right lobal pneumonia<br>(1),normal(2)<br>Influenza A: (2)<br>Influenza B: (1)<br>Influenza A+B: (1)                                                                | oseltamivir (4)<br>hydroxychloroquine (4)<br>lopinavir-ritonavir (4)<br><br>Hospitalization: 4<br>Oxygen: 3<br>Intubation: 3<br>Discharge: 1<br>Unknown outcome: 3 |
| Konala et al<br>[44] / USA               | Early<br>2020           | One 66-yo woman<br><br>Comorbidities: obesity,<br>ischemic<br>cardiomyopathy, DM,<br>HTN, CAD, CKD                           | synoptic episode, fever, SOB,<br>non-productive cough, decreased<br>appetite, hypoxia<br><br>CXR: right lower lobe infiltrate<br><br>Low WBCs and lymphocytes<br><br>Influenza A                                                                                                                                     | azithromycin,<br>oseltamivir,<br>ceftriaxone,<br>hydroxychloroquine<br><br>Hospitalization: 1<br>Oxygen: 1<br>Intubation: 1<br>Unknown outcome: 1                  |
| Hashemi et al<br>[45] /Iran              | March-<br>April<br>2020 | 2 cases<br><br>78 y.o. female<br>75 y.o. male<br><br>Comorbidities: chronic<br>lung disease (1)                              | Fever (2), dyspnea (2), joint pain<br>(2), cough (1), headache (1),<br>confusion (1), joints pain (2),<br>nausea (1), diarrhea (1)<br><br>Increased WBCs (1), low WBCs<br>(1), increased CRP (2),<br>lymphopenia (2)<br>Complications: ARDS (1)<br>CT: peripheral GGOs (2),<br>interlobular septal thickening<br>(2) | Hydroxychloroquine (2)<br>lopinavir/ritonavir (2)<br>Hospitalization: 2<br>Oxygen: 2<br>Intubation: 2<br>Death: 2                                                  |

| Influenza A (2)                   |            |                                                                                    |                                                                                                                                                                                                                                                                                                                                                                                         |                                                                                                                                |
|-----------------------------------|------------|------------------------------------------------------------------------------------|-----------------------------------------------------------------------------------------------------------------------------------------------------------------------------------------------------------------------------------------------------------------------------------------------------------------------------------------------------------------------------------------|--------------------------------------------------------------------------------------------------------------------------------|
| Munivenkatappa et al [46] / India | April 2020 | One 65-y.o. male<br><br>Comorbidities: obesity, COPD, DM, CKD, HTN, hypothyroidism | Breathlessness, productive cough, no fever, oxygen saturation <90, normal WBCs, lymphopenia<br><br>Complications: ARDS<br><br>CXR: bilateral patchy consolidation<br>PCR: Influenza A, SARS-CoV-2                                                                                                                                                                                       | Oseltamivir, ceftriaxone, azithromycin, hydroxychloroquine<br><br>Hospitalization: 1<br>Oxygen: 1<br>Intubation: 1<br>Death: 1 |
| Coutinho et al [47] / UK          | 2020       | One 74-y.o. male<br><br>Comorbidities: COPD, DM, HTN                               | Non-productive cough, low-grade fever, myalgia, malaise. SOB, 86% oxygen saturation<br><br>Lymphopenia, increased CRP<br><br>CXR: GGOs bilaterally<br>PCR: influenza B, SARS-CoV-2                                                                                                                                                                                                      | oseltamivir, hydrocortizone, doxycycline, azithromycin<br><br>Hospitalization: 1<br>Oxygen: 1<br>Intubation: 1<br>Discharge: 1 |
| Azekawaa et al [48] / Japan       | 2020       | One 78-y.o. woman<br><br>Comorbidities: hypothyroidism, dislipidemia               | Mmalaise, anorexia, cough, low-grade fever<br><br>CXR: bilateral reticular shadow<br>CT: GGO<br><br>Influenza A                                                                                                                                                                                                                                                                         | oseltamivir<br>ceftriaxone<br>azithromycin<br><br>Hospitalization: 1<br>Oxygen: 0<br>Intubation: 0<br>Discharge: 1             |
| Yu et al [49] / China             | NA         | 64 co-infected cases (50% of 128 COVID-19 patients)                                | Ccoinfected patients vs non-coinfected patients:<br>1.no difference in lung involvement, 2.longer median virus shedding from admission for coinfectd patients, 3.no relation with pneumonia severity<br><br>lopinavir/ritonavir treated co-infected patients: faster pneumonia resolution within 2 weeks (37% vs 1%, p=0.001)<br><br>Influenza A: 54 (84.4%)<br>Influenza B: 10 (15.6%) | lopinavir/ritonavir N/A<br><br>Hospitalization: 64<br>Intubation: N/A<br>Oxygen: N/A<br>Discharge: 64                          |
| D'Abramo et al [50] / Italy       | 2020       | One 56-y.o. male<br><br>Comorbidities: smoker, overweight, MI                      | Fever, diarrhea, asthenia lymphopenia, increased CRP and serum fibrinogen levels<br>1 <sup>st</sup> CT: bilateral multiple peripheral GGOs<br>2 <sup>nd</sup> CT: worsening bilateral                                                                                                                                                                                                   | oOseltamivir lopinavir/ritonavir, ceftriaxone, azithromycin, methylprednisolone iv<br><br>Hospitalization: 1<br>Oxygen: 1      |

|                                    |              |                                                                                                                                                               |                                                                                                                                                                                                                                                                                              |                                                                                                                                                                                 |
|------------------------------------|--------------|---------------------------------------------------------------------------------------------------------------------------------------------------------------|----------------------------------------------------------------------------------------------------------------------------------------------------------------------------------------------------------------------------------------------------------------------------------------------|---------------------------------------------------------------------------------------------------------------------------------------------------------------------------------|
|                                    |              |                                                                                                                                                               | GGO, bilateral fibrotic consolidation<br>Complications: respiratory failure<br>PCR: Influenza A, SARS-CoV-2                                                                                                                                                                                  | Intubation: 0<br>Discharge: 1                                                                                                                                                   |
| Lozano-Parras et al [51] / NA      | January 2020 | 46-y.o. woman<br><br>Comorbidities: RA, ILD, COPD, HTN                                                                                                        | Dry cough, fever, prostration, arthromyalgia, dyspnea<br>89% oxygen saturation.<br>Low WBCs, lymphopenia, low platelets<br>CXR: consolidation in left upper lobe and right perihilar region<br>PCR: Influenza A, SARS-CoV-2                                                                  | oseltamivir, levofloxacin<br>systemic steroids<br><br>Hospitalization: 1<br>Oxygen: 1<br>Intubation: 0<br>Discharge: 1                                                          |
| Jing et al [52] / USA              | 2020         | 60-y.o. woman<br><br>Comorbidities: ESRD                                                                                                                      | Non-productive cough, SOB, diarrhea, fever, worsening influenza-like symptoms, abdominal pain, nausea, vomiting<br><br>CT: multifocal areas of consolidation, extensive hilar and mediastinal adenopathy<br><br>RADT: Influenza A<br>PCR: SARS-CoV-2                                         | oseltamivir<br>vancomycin/cefepime<br><br>Hospitalization: 1<br>Oxygen: N/A<br>Intubation: N/A<br>Discharge: 1                                                                  |
| Lew et al [53] / USA               | 2020         | 32-y.o. man<br><br>No comorbidities                                                                                                                           | Fever, cough, SOB<br><br>CXR: peripheral patchy opacities in lower lung zones<br>2 <sup>nd</sup> CXR: worsening opacities<br>CT: extensive bilateral GGOs with areas of confluent consolidation in posterior lung bases<br>Complications: ARDS, acute kidney injury (hemodialysis), diabetes | ceftriaxone, azithromycin, hydroxychloroquine<br>linezolid,<br>oseltamivir<br>lopinavir/ritonavir<br><br>Hospitalization: 1<br>Oxygen: 1<br>Intubation: 1<br>Death: 1           |
| Alosaimi et al [54] / Saudi Arabia | 2020         | 34 co-infected cases (71% of 48 COVID-19 patients)<br>Influenza A H1N1 (17 cases, 50% of co-infected), <i>C. pneumoniae</i> (13 cases), adenovirus (10 cases) | NA                                                                                                                                                                                                                                                                                           | Hospitalization: 48<br>Oxygen: N/A<br>Intubation: N/A<br>Death: 1/3 of no co-infected COVID-19 cases, 2/3 of co-infected cases<br><br>Association of influenza A with mortality |

|                                  |                              |                                                                                                                                                   |                                                                                                                                                                                                                                                                                                                                                                                                          |                                                                                                                                                                                                |
|----------------------------------|------------------------------|---------------------------------------------------------------------------------------------------------------------------------------------------|----------------------------------------------------------------------------------------------------------------------------------------------------------------------------------------------------------------------------------------------------------------------------------------------------------------------------------------------------------------------------------------------------------|------------------------------------------------------------------------------------------------------------------------------------------------------------------------------------------------|
| Fontana et al [55] / Italy       | March – June 2020            | 152 respiratory specimens positive for SARS-CoV-2 (66 from BAL; 86 from SPU)<br><br>93 males, 59 females<br><br>Mean age: 65 years                | 93 (61%) FAPP positive for bacteria and/or viruses:<br><br>Bacteria: <i>S. aureus</i> (30/44, 62%), and Gram-negative pathogens: <i>P. aeruginosa</i> , <i>K. pneumoniae</i> , <i>A. baumannii</i> , and <i>H. influenzae</i> ;<br><br>One case with influenza A                                                                                                                                         | NA                                                                                                                                                                                             |
| Maddali et al [56] / USA         | N/A                          | two-week-old healthy-term female neonate                                                                                                          | apnea, nasal congestion, no fever, no cough, no vomiting<br>100% oxygen saturation<br>CXR: no consolidation<br>RADT: Influenza<br>PCR: SARS-CoV-2                                                                                                                                                                                                                                                        | NA<br><br>Hospitalization: 1<br>Oxygen: 0<br>Intubation: 0<br>Discharge: 1                                                                                                                     |
| Aggarwal et al [57] / India      | July 2021 - January 2022     | 13,467 samples from both community and hospital settings tested for SARS-CoV-2/influenza virus co-infection during ILI/SARI sentinel surveillance | 5 (0.04%) with SARS-CoV-2/influenza virus co-infection                                                                                                                                                                                                                                                                                                                                                   | NA<br><br>Hospitalization: 3/5 co-infected patients<br>Oxygen: 0<br>Intubation: 0<br>Discharge: 3                                                                                              |
| Alhouf et al [58] / Saudi Arabia | May - June 2020              | 1 <sup>st</sup> case: 66 y.o. female<br>2 <sup>nd</sup> case: 44 y.o. male<br><br>Comorbidities<br>1. DM type 2<br>2. no comorbidities            | Fever (2), productive cough (2), chest pain (1), SOB (2), diarrhea (1),<br>88% oxygen saturation (1)<br><br>CXR: 1.bilateral coarse reticular shadow, 2.bilateral hilar bronchial wall thickening<br><br>Also, parainfluenza type 2<br>Influenza IgM and Influenza B                                                                                                                                     | 1. ceftriaxone, hydroxychloroquine, methylprednisolone<br>2. amoxicillin-clavulanate, azithromycin, hydroxychloroquine<br><br>Hospitalization: 2<br>Oxygen: 1<br>Intubation: 0<br>Discharge: 2 |
| Ishiguro et al [59] / Japan      | February 2020 - January 2021 | 298 patients (mean age: 61.1 y.o.) with CAP due to severe SARS-CoV-2 infection<br><br>Comorbidities: in 63.4% of patients                         | Primary viral pneumonia: 90.3%, mixed viral and bacterial pneumonia: 9.7% (mainly <i>M. pneumoniae</i> )<br>Viral coinfection in 30.5% of patients with viral pneumonia. Influenza and parainfluenza viruses were the most common co-viruses (9.4% and 9.1%), coronavirus (6.0%), adenovirus (4.7%), bocavirus (3.4%), rhinovirus (3.0%), parechovirus(2.3%), hMPV (2.0%), RSV (2%), enterovirus (1.3%). | Mortality: 7.7%<br><br>Viral and bacterial co-infections were not associated with severity on admission, need for high-flow nasal cannula, invasive ventilation, and mortality.                |

|                                        |                             |                                                                                                                                                                                                                                 |                                                                                                                                                                                                                                                                                                                                                                                                                                                                  |                                                                                                                                                                                                                                                        |
|----------------------------------------|-----------------------------|---------------------------------------------------------------------------------------------------------------------------------------------------------------------------------------------------------------------------------|------------------------------------------------------------------------------------------------------------------------------------------------------------------------------------------------------------------------------------------------------------------------------------------------------------------------------------------------------------------------------------------------------------------------------------------------------------------|--------------------------------------------------------------------------------------------------------------------------------------------------------------------------------------------------------------------------------------------------------|
| Rizzo et al [60] / USA                 | September 2020 - April 2021 | Of 255 influenza-positive patients also tested for SARS-CoV-2, 58 (23%) positive. 22 females (38%), 35 males (60%), unknown 1 (2%)<br>Age groups: 5 (9%) 0-17 y.o., 23 (40%) 18-49 y.o., 12 (21%) 50-64 y.o., 18 (31%) >65 y.o. | Among co-infected persons: 39 (67%) had influenza B. Among 28 with hospitalization record, 11 (39%) were hospitalized. Five (9%) died, including two who were hospitalized. All five who died were >50 years old.                                                                                                                                                                                                                                                | Hospitalization: 11<br>Intubation: N/A<br>Oxygen: N/A<br>Discharge: 9<br>Death: 2 and 3 non-hospitalized                                                                                                                                               |
| Heshmat-Ghahdarijani et al [61] / Iran | February – March 2020       | Of 1639 SARS-CoV-2 patients only 2 were positive for influenza B.<br><br>76 y.o. male, 62 y.o. female<br><br>Comorbidities: DM, HTN, CHD, CKD                                                                                   | Fever (2), dyspnea (1), body pain (1), dry cough (1), hemoptysis (1), muscular pain (1), respiratory distress (1)<br><br>CXR: bilateral diffuse infiltrates<br><br>CT: bilateral multiple patchy GGOs<br><br>Influenza B and SARS-CoV-2                                                                                                                                                                                                                          | levofloxacin iv (1)<br>oseltamivir p.o.(2)<br>hydroxychloroquine (2)<br>methylprednisolone i.v.<br>ceftriaxone i.v(1)<br><br>Hospitalization: 2<br>Oxygen: N/A<br>Intubation: N/A<br>Discharge: 2<br>Both cases symptom- free after 3-months follow-up |
| Ali et al [62] / USA                   | A                           | Five co-infected cases (61 y.o. female, 33 y.o. male, 46 y.o. male, 57 y.o. female, 41 y.o. male)<br><br>Comorbidities: asthma, fever, COPD                                                                                     | Cough (3), fever (5), diarrhea (1), SOB (3), low oxygen saturation (2), double vision, myalgias (2), vomiting (1)<br>CXR: diffuse patchy bilateral infiltrates, patchy left lower lung density, mild diffuse bronchial wall thickening, extensive GGOs at peripheral zones<br>CT: bilateral multi-lobar peripheral GGOs<br>raised inflammatory markers (5)<br>PCR/RADT: SARS-CoV-2 (5)<br>RADT: Influenza A (1)<br>RADT: Influenza B (3)<br>PCR: Influenza B (1) | remdesivir (5)<br>oseltamivir (4)<br>azithromycin (1)<br>dexamethazone(4)<br>ceftriaxone (1)<br>metronidazole (1)<br><br>Hospitalization: 5<br>Oxygen: 1<br>Intubation: 1<br>Discharge: 5                                                              |
| Zheng et al [63] / China               | January - November 2020     | 220 adults with H1N1, 285 with COVID-19, 36 with COVID-19 and influenza H1N1<br>Median age of COVID-19 patients: 47 y.o.<br>Median age of H1N1 patients: 50 y.o.                                                                | Coinfected patients had more fever and myalgia than COVID-19 patients                                                                                                                                                                                                                                                                                                                                                                                            | SARS-CoV-2 and H1N1 co-infection more severe disease c/w mono-infection with influenza or SARS-CoV-2<br>SARS-CoV-2 vs H1N1 co-infection: 2.8% mortality vs 0% of COVID-19 patients; 13.9% ICU admission vs 5.2%                                        |



|                                 |                            |                                                                                                                                                                                              |                                                                                                                                              |                                                                                                                                                                                                                                           |
|---------------------------------|----------------------------|----------------------------------------------------------------------------------------------------------------------------------------------------------------------------------------------|----------------------------------------------------------------------------------------------------------------------------------------------|-------------------------------------------------------------------------------------------------------------------------------------------------------------------------------------------------------------------------------------------|
| Akhtar et al [64] / Bangladesh  | March to December 2020     | 1986 patients with SARI (median age: 28 years):<br>285 (14.3%) SARS-CoV-2-positive patients, 175 (8.8%) influenza-positive patients, 5 (0.3%) SARS-CoV-2 and influenza coinfecting patients  | NA                                                                                                                                           | 31 (10%) patients with SARS-CoV-2 SARI died<br><br>One-month post-discharge: 25 additional deaths (9.1%) in SARS-CoV-2 infected patients<br>No in-hospital or post-discharge mortality within one month among the 5 coinfecting patients. |
| Venkatram et al [65] / USA      | 2017-2021                  | 412 influenza patients vs 18 co-infected patients<br>Mean age: 60 y.o.<br>Comorbidities: common                                                                                              | NA                                                                                                                                           | NA<br><br>Overall mortality: 6.5%.<br>COVID-19: no increased mortality among co-infected patients                                                                                                                                         |
| Sreenath K, et al. [66] / India | June 2020-January 2021     | Of 191 COVID-19 patients, 89 (46.6%) had co-infection with $\geq 1$ pathogens<br>Median age: 50 years<br>Comorbidities: 140 (89%)                                                            | Overall, 13 co-pathogens were identified:<br>Bacterial coinfections: 41.4%<br>Viral co-infections: 7.3% (mostly adenovirus and rhinoviruses) | NA                                                                                                                                                                                                                                        |
| Jeong et al [67] / Korea        | August 2020 - October 2021 | 35/436 adult COVID-19 patients (57 inpatients and 379 outpatients) with influenza co-infection<br>Coinfecting adults; older median age (70 vs 46 years); more often admitted (85.7% vs 6.7%) | Coinfecting patients had significantly higher Cts and inflammatory markers, but less lymphocyte count                                        | Risk factors for mortality: co-infection, older age, elevated lactate dehydrogenase                                                                                                                                                       |
| Castillo et al [68] /USA        | March 2020                 | 588 patients tested for SARS-CoV-2 with other respiratory infections on presentation                                                                                                         | 51 (8.7%) patients were positive for COVID-19 with one positive for another respiratory infection and one for influenza A                    | NA                                                                                                                                                                                                                                        |

SARS-CoV-2: severe acute respiratory syndrome coronavirus 2; COVID-19: coronavirus disease 2019; SOB: shortness of breath; DM: diabetes mellitus; CT: computer tomography; GGOs: ground glass opacities; PCR: polymerase chain reaction; NA: not available; HTN: hypertension; CXR: chest-X-ray; USA: United States of America; RADT: rapid antigen detection test; RA: rheumatoid arthritis; ILD: interstitial lung disease; ARDS: acute respiratory distress syndrome; COPD: chronic obstructive pulmonary disease; UK: United Kingdom; RSV: respiratory syncytial virus; vs: versus; LRTIs: lower respiratory tract infections; hMPV: human metapneumovirus; ICU: intensive care unit; WBCs: white blood cells; TNF $\alpha$ : tumor necrosis factor  $\alpha$ ; GI: gastrointestinal tract; HF: heart failure; CKD: chronic kidney disease; ESRD: end-stage renal disease; MI: myocardial infarction; CRP: C-reactive protein; CVD: cardiovascular disease; Ca: cancer; BAL: bronchoalveolar lavage fluid; CAD: coronary artery disease; CFU: colony forming units; SPU: sputum; *S. aureus*: *Staphylococcus aureus*; *P. aeruginosa*: *Pseudomonas aeruginosa*; *K. pneumoniae*: *Klebsiella pneumoniae*; *A. baumannii*: *Acinetobacter baumannii*; *H. influenzae*: *Haemophilus influenzae*; TOF MS: time of flight mass spectrometry; ILI/SARI: influenza-type illnesses/severe acute respiratory infection; CAP: community-acquired pneumonia; *M. pneumoniae*: *Mycoplasma pneumoniae*; CHD: congestive heart disease; c/w: compared with; Ct: cycle threshold value

**Supplementary File S2.** Articles reporting co-infections of SARS-CoV-2 and respiratory viruses other than influenza (as of April 12, 2022).

| <b>Study / country</b>          | <b>Time period</b>                                     | <b>Number of co-infected patients / Characteristics</b>                                                                                                                                                                                                                                                                                                                                                                                               | <b>Findings</b>                                               | <b>Management / Outcome</b>                                                   |
|---------------------------------|--------------------------------------------------------|-------------------------------------------------------------------------------------------------------------------------------------------------------------------------------------------------------------------------------------------------------------------------------------------------------------------------------------------------------------------------------------------------------------------------------------------------------|---------------------------------------------------------------|-------------------------------------------------------------------------------|
| Uhteg et al [18] / USA          | December 2019-October 2021                             | 4/173 SARS-CoV-2 positive samples were also positive for enterovirus/rhinovirus (3) or adenovirus (1)<br>Overall, enterovirus was the prevalent co-virus<br>Coinfected patients were mostly children ( $\leq 18$ y.o.)                                                                                                                                                                                                                                | NA                                                            | NA                                                                            |
| Kanji et al [22] / Canada       | June 2020-May 2021                                     | 4818 SARS-CoV-2 positive specimens (94.8% from adults, 53% males, median age: 56 years, ~50% outpatients) tested by multiplex PCR<br>Co-infections in 134 (2.8%) cases (in children (10% vs 2.4% in adults)<br>Enterovirus (118 cases; 88.1%), adenovirus (5 cases; 3.7%), RSV (4 cases; 3%), human coronaviruses (3 cases; 2.2%), parainfluenza viruses (2 cases; 1.5%), hMPV (2 cases; 1.5%)<br>Enterovirus and adenovirus predominated in children | NA                                                            | NA                                                                            |
| De Francesco et al [23] / Italy | January 2017 - February 2020 c/w March 2020 - May 2021 | Hospitalized adults with respiratory symptoms: 10,121 samples before COVID-19 pandemic and 2362 during pandemic: positivity: 14.6% vs 2.7%<br>Before the pandemic: co-infections with different respiratory viruses (influenza A-B, hMPV, parainfluenza, RSV, coronaviruses, adenovirus)<br>During the pandemic: coinfections only with SARS-CoV-2 and rhinovirus (6 cases)                                                                           | SOB, sore throat, cough and fever $\geq 37.5^{\circ}\text{C}$ | NA                                                                            |
| Ippolito et al [24] / Italy     | November to February 2018/2019, 2019/2020, 2020/2021   | 178 hospitalized children $\leq 2$ y.o. with LRTIs (66 in 2018/2019, 96 in 2019/2020, 16 in 2020/2021); in 171 children (96%) a virus detected (61 children (36%) with co-infections)<br>Median age: 5 (2-13) months<br>53% males<br>In COVID-19 pandemic 2/16 children positive for SARS-CoV-2: both had co-infection (bocavirus and rhinovirus)                                                                                                     | NA                                                            | NA                                                                            |
| Wanga et al [74] / USA          | July – August 2021                                     | 113/713 (15.8%) children $< 18$ y.o. hospitalized with COVID-19 had a viral coinfection (32.4% of $< 1$ y.o., 36.1% of                                                                                                                                                                                                                                                                                                                                | NA                                                            | Co-infected children: more frequently oxygen support than COVID-19 only (69%) |

|                             |                            |                                                                                                                                                                                                                                                                                                                                                                                                          |                                                                                                                                                                                                                   |                                                                                                                                                                                                                 |
|-----------------------------|----------------------------|----------------------------------------------------------------------------------------------------------------------------------------------------------------------------------------------------------------------------------------------------------------------------------------------------------------------------------------------------------------------------------------------------------|-------------------------------------------------------------------------------------------------------------------------------------------------------------------------------------------------------------------|-----------------------------------------------------------------------------------------------------------------------------------------------------------------------------------------------------------------|
|                             |                            | 1-4 y.o.; 4.2% of 5-11 y.o., and 2.2% of 12-17 y.o.)<br>RSV: 75 cases (66.4 % of coinfecting cases)                                                                                                                                                                                                                                                                                                      |                                                                                                                                                                                                                   | vs 51.2%). No difference in terms of ICU admission, duration of stay, ECMO required or outcome                                                                                                                  |
| Ishiguro et al [59] / Japan | February 2020-January 2021 | 91/298 (30.5%) patients with CAP due to SARS-CoV-2 with viral co-infection: influenza (28 cases; 9.4%), parainfluenza (27 cases; 9.1%), cold coronavirus (18 cases; 6%), adenovirus (14 cases; 4.7%), bocavirus (10 cases; 3.4%), rhinovirus (9 cases; 3%), parechovirus (7 cases; 2.3%), hMPV (6 cases; 2%), RSV (6 cases, 2%), enterovirus (4 cases; 1.3%)<br>Bacterial co-infections: 10 cases (9.7%) | NA                                                                                                                                                                                                                | Co-infection was not a risk factor for need of high-flow oxygen therapy, invasive mechanical ventilation or mortality                                                                                           |
| Sreenath et al [66] / India | June 2020-January 2021     | 89/191 (47.1%) SARS-CoV-2 positive patients (median age: 50 years, 895 with comorbidities) had coinfection: 79 (41.4%) bacterial co-infection 14 (7.3%) viral co-infection (coronaviruses: 4, rhinovirus: 4, adenovirus: 3 cases, influenza B: 2)                                                                                                                                                        | Fever (88.4%), cough (60.2%), SOB (58.6%), confusion (18.8%), abdominal pain-diarrhea(9.9%), headache (7.3%)<br>Coinfected patients: more often abnormal creatinine levels, lower platelet counts, and higher CRP | Higher rates of ICU admission among coinfecting patients<br><br>36 (40%) co-infected patients died                                                                                                              |
| Jeong et al [67] / Korea    | August 2020-October 2021   | 35/436 COVID-19 patients had co-infection: 6/436 (1.4%) with respiratory viruses: RSV (2), rhinovirus (2), bocavirus (1), influenza B (1) 3 cases: 20-39 y.o.<br>Comorbidities: 4 patients (HTN)                                                                                                                                                                                                         | Fever (6), dyspnea (6), cough (6) Chest X-ray: infiltrates (2) Complications: renal failure (1)                                                                                                                   | Hospitalization: 2<br>Oxygen: 0<br>Intubation: 1<br>Discharge: 1<br>Death: 1                                                                                                                                    |
| Chekuri et al [75] / USA    | 11 March-11 April 2020     | 14/306 (4.6%) SARS-CoV-2 positive adults (median age: 56 years) were positive for a non-influenza virus: human coronavirus (7; 46.6%), human rhinovirus (4; 26.7%), parainfluenza 3 (2; 13.3%), adenovirus (1; 6.7%), RSV B (1; 6.7%)<br>Comorbidities: 60.1% HTN, 36% DM                                                                                                                                | NA                                                                                                                                                                                                                | C/w co-infected patients, those with SARS-CoV-2 only were more likely to be admitted in ICU (73.6% vs 42.9%)<br>Severe outcome in 111 (36.3%) SARS-CoV-2 infected patients vs 3 (21.4%) in co-infected patients |
| Soto et al [76] / Peru      | September - December 2020  | 3/93 hospitalized patients with COVID-19 pneumonia had virus co-infection: rhinovirus (2), adenovirus (1)                                                                                                                                                                                                                                                                                                | NA                                                                                                                                                                                                                | Unfavorable outcome: 1                                                                                                                                                                                          |

|                                   |                                      |                                                                                                                                                                                                                                                                                                                                                                                               |                                                                                                                                                                             |                                                                                                                                                                                            |
|-----------------------------------|--------------------------------------|-----------------------------------------------------------------------------------------------------------------------------------------------------------------------------------------------------------------------------------------------------------------------------------------------------------------------------------------------------------------------------------------------|-----------------------------------------------------------------------------------------------------------------------------------------------------------------------------|--------------------------------------------------------------------------------------------------------------------------------------------------------------------------------------------|
| Cooksey et al [77] / USA          | May 2020<br>June 2021                | 23/1373 (1.7%) persons positive for SARS-CoV-2 had co-infections: 19 rhinovirus/enterovirus, 1 adenovirus, 1 <i>M. pneumoniae</i> , 1 parainfluenzae type 4, 1 human coronavirus plus parainfluenzae type 1                                                                                                                                                                                   | NA<br>.                                                                                                                                                                     | NA                                                                                                                                                                                         |
| Perez-Lazo et al [78] / Peru      | July-<br>November<br>2020            | 154 of 295 adults (52.2%) with moderate/severe COVID-19 pneumonia<br>At admission: co-infection with <i>M. pneumoniae</i> (28.1%), <i>C. pneumoniae</i> (8.8%), both bacteria (11.5%), adenovirus (1.7%), <i>M. pneumoniae</i> / adenovirus (0.7%), <i>C. pneumoniae</i> /adenovirus (0.7%), RSV/ <i>C. pneumoniae</i> (0.3%), <i>M. pneumoniae</i> / <i>C. pneumoniae</i> /adenovirus (0.3%) | Coinfected patients more often sepsis c/w mono-infected patients (33.1% vs 20.6%), more mean duration in ICU (16 vs 8 days), and mean duration of intubation (16 vs 9 days) | No difference in mortality between co-infected and mono-infected SARS-CoV-2 patients (20.8% versus 19.2%)                                                                                  |
| Karaaslan et al [79] / Turkey     | March 2020-<br>May 2020              | 7/93 children (7,5%) with SARS-CoV-2 were co-infected.<br>Rhinovirus/enterovirus: 2<br>Coronavirus NL63: 2<br>Adenovirus: 1<br><i>M. pneumoniae</i> : 1<br>Rhinovirus/enterovirus/adenovirus: 1<br>Mean age: 10,02 years (range: 1 month-17,8 years)<br>51,6% males                                                                                                                           | Fever (68.8%), cough (57%), headache (10.8%) myalgia (5.4%), also sore throat, SOB, diarrhea, abdominal pain                                                                | Significantly longer hospital stays in patients with co-infection                                                                                                                          |
| Ling Ma et al [80] / Wuhan, China | January 19<br>to Feb 26,<br>2020     | 250 patients with COVID-19 (diagnosis of co-infections by PCR and immunoassays)<br>RSV: 12 (4.8%); adenovirus: 7 (2.8%); influenza A: 2 (0.8%); influenza B: 1 (0.4%); <i>M. pneumoniae</i> : 11 (4.4%); <i>C. pneumoniae</i> : 13 (5.2%)                                                                                                                                                     | Acute fever or respiratory symptoms                                                                                                                                         | No significant difference in age and sex between mono-SARS-CoV-2 and coinfecting group                                                                                                     |
| Zhu et al [81] / China            | January 22 to<br>February 2,<br>2020 | 243/257 COVID-19 patients (mean: age 51 y.o.) had a co-infection: 81 (31.5%) viral, 236 (91.8%) bacterial, and 60 (23.3%) fungal co-infection<br>Respiratory viruses detected: rhinovirus (12 cases, 4.7 %), adenovirus (10 cases, 3.9 %), influenza B (5 cases, 1.9 %), influenza A (2 cases, 0.8 %), bocavirus (1 case, 0.4 %), hMPV (1 case, 0.4 %)                                        |                                                                                                                                                                             | The rates of viral co-infection (6, 35.3 %), fungal co-infection (5, 29.5 %) and bacterial-fungal co-infection (5, 29.5 %) were the highest in severe/critical category) of COVID-19 cases |
| oschi et al [82] / France         | March to<br>April 2020               | 27/643 (4.2%) SARS-CoV-2 positive patients had a virus co-infection: Rhinovirus (11), coronaviruses (5), influenza (4), parainfluenza (3), enterovirus (2), bocavirus (2),                                                                                                                                                                                                                    | NA                                                                                                                                                                          | NA                                                                                                                                                                                         |

|                           |                                 |                                                                                                                                                                                                                                                                                                                           |                                                                                                                                                                                                                                                                                                                                                                                      |                                                                    |
|---------------------------|---------------------------------|---------------------------------------------------------------------------------------------------------------------------------------------------------------------------------------------------------------------------------------------------------------------------------------------------------------------------|--------------------------------------------------------------------------------------------------------------------------------------------------------------------------------------------------------------------------------------------------------------------------------------------------------------------------------------------------------------------------------------|--------------------------------------------------------------------|
|                           |                                 | adenovirus (1), hMPV (1)<br>13 (48.2%) males<br>Mean age: 59.6 y.o.                                                                                                                                                                                                                                                       |                                                                                                                                                                                                                                                                                                                                                                                      |                                                                    |
| Allou et al [83] / France | March 18 to April 15, 2020      | 5/36 (13.9%) patients with COVID-19 and hypoxemic pneumonia were co-infected, 3/5 with virus: influenza H1N1 (1), coronavirus (1), rhinovirus (1)                                                                                                                                                                         | No differences in disease severity on chest CT (mainly GGOs and bilateral infiltrates) and in hospital length of stay between co-infected and no co-infected patients                                                                                                                                                                                                                | Hospitalization: 3<br>Oxygen: NA<br>Intubation: NA<br>Discharge: 3 |
| Tang et al [84] / China   | January 28 to March 15, 2020    | 11/78 (14.1%) patients with COVID-19 pneumonia (6 men, mean age: 42.7 years) co-infected: <i>M. pneumoniae</i> (5; 45.5%), RSV (4; 36.4%), influenza B (1), adenovirus (1), Mycoplasma and Chlamydia (1), Mycoplasma and RSV (1), C. pneumoniae + Legionella (pneumophila).<br><br>Comorbidities: CVD (1), HTN and DM (1) | Higher procalcitonin levels among coinfecting patients.<br>No differences in other tests.<br><br>Almost all coinfecting patients had unilateral or bilateral pulmonary lesions, except one patient with influenza B but no CXR lesions.<br>No differences in sex, age, comorbidities, symptoms, CT findings, severity, length of stay between co-infected and mono-infected patients | Quinolones                                                         |
| Li Yet al [85] / China    | January 21 to February 16, 2020 | 27/81 (33%) children with COVID-19 were co-infected (mainly <i>M. pneumoniae</i> : 20 cases; 25%).<br>Viral co-infection in 6 (7%): children: influenza B: 2 (2%), influenza A + <i>M. pneumoniae</i> , parainfluenza + <i>M.</i>                                                                                         | No difference in clinical and laboratory findings or hospital stays between co-                                                                                                                                                                                                                                                                                                      | Hospitalization: 27<br>Oxygen: 0<br>Intubation: 1<br>Discharge: 27 |

|                                          |                                         |                                                                                                                                                                                                                                                           |                                                                                                                                                                                 |                                                                                                                                                                                      |
|------------------------------------------|-----------------------------------------|-----------------------------------------------------------------------------------------------------------------------------------------------------------------------------------------------------------------------------------------------------------|---------------------------------------------------------------------------------------------------------------------------------------------------------------------------------|--------------------------------------------------------------------------------------------------------------------------------------------------------------------------------------|
|                                          |                                         | pneumoniae,<br>adenovirus + <i>M. pneumoniae</i> , RSV: 1<br>case each (1% each)<br><br>No comorbidities                                                                                                                                                  | infected and<br>mono-infected<br>children (only<br>lower WBCs,<br>neutrophil and<br>lymphocyte<br>counts)<br>Chest imaging<br>of co-infected:<br>consolidation in<br>more cases |                                                                                                                                                                                      |
| Nowak et<br>al [86] /<br>USA             | March 16 to<br>April 20,<br>2020        | 36/1204 (2.9%) COVID-19 patients<br>were coinfecting:<br>other coronaviruses (1.5%), RSV<br>(0.3%), adenovirus (0.2%),<br>rhinovirus/enterovirus (0.7%), hMPV<br>(0.4%), influenza A (0.1%)<br><br>Coinfected patients' mean age: 60<br>years; 56% female | NA                                                                                                                                                                              | NA                                                                                                                                                                                   |
| Schirmer<br>et al [87] /<br>USA          | September 29<br>2019 to May<br>31, 2020 | 56/3757 (1.5%) persons tested positive<br>for SARS-CoV-2 had co-infection:<br>rhinovirus, enterovirus (19), influenza<br>(15), non-COVID-19 coronavirus (13),<br>RSV (4), hMPV (3), parainfluenza (2),<br>adenovirus (2), <i>C. pneumoniae</i> (1)        | No differences<br>of<br>hospitalization<br>rate, length of<br>hospitalization,<br>ICU admission,<br>and mortality<br>among COVID-<br>19 only and co-<br>infected patients       | 10/56 (18%) COVID-19<br>co-infected patients died<br>(4 had rhinovirus and/or<br>enterovirus, 2 had non-<br>COVID-19 coronavirus,<br>1 influenza, 1 hMPV,<br>1 parainfluenza, 1 RSV) |
| Weissberg<br>et al [88] /<br>Switzerland | March 10,<br>2020                       | 11/13 exposed cases (outbreak)<br>developed COVID-19, of them 2 (index<br>case and another case) had adenovirus<br>co-infection                                                                                                                           | Fatigue, cough,<br>fever, sore<br>throat,<br>rhinorrhea                                                                                                                         | NA                                                                                                                                                                                   |
| Si et al<br>[89] /<br>China              | January 21<br>to February<br>29, 2020   | 1 of 24 COVID-19 patients had<br>parainfluenza virus 2 co-infection                                                                                                                                                                                       | NA                                                                                                                                                                              | NA                                                                                                                                                                                   |
| Hashemi<br>et al [90] /<br>Iran          | 2020                                    | 3 SARS-CoV-2 infected dead children<br>(2 females) 13 months, 6 yrs and 6 yrs<br>old<br>Comorbidities: asthma (2)<br><br>PCR: also, hMPV (3)                                                                                                              | Cough, fever,<br>malaise,<br>diarrhea<br>lymphopenia<br>(3), increased<br>CRP (3)<br>CT: bilateral<br>GGOs (3)                                                                  | Hospitalization: 3<br>Oxygen: 0<br>Intubation: 3<br>Death: 3                                                                                                                         |
| Leuzinger<br>et al [91] /<br>Switzerland | January to<br>March 2020                | 17/105 SARS-CoV-2 positive cases<br>were coinfecting: human coronavirus<br>(5), rhinovirus (5), parainfluenza virus<br>(3), influenza A (2), rhinovirus and                                                                                               | Influenza-like<br>illness                                                                                                                                                       | NA                                                                                                                                                                                   |

|                                  |      |                                                                                                                                                                                   |                                                                                                                                                                                                        |                                                                                                                                                        |
|----------------------------------|------|-----------------------------------------------------------------------------------------------------------------------------------------------------------------------------------|--------------------------------------------------------------------------------------------------------------------------------------------------------------------------------------------------------|--------------------------------------------------------------------------------------------------------------------------------------------------------|
|                                  |      | adenovirus (1), rhinovirus, RSV and parainfluenza virus (1)                                                                                                                       |                                                                                                                                                                                                        |                                                                                                                                                        |
| Motta et al [92] / Colombia      | 2020 | 40-year-old man: COVID-19 + adenovirus (also <i>K. oxytoca</i> )<br><br>Comorbidities: DM                                                                                         | Odynophagia, dry cough, dyspnea, fever, fatigue, racheepnea, arthralgia, 82% oxygen saturation<br><br>CXR: right basal GGO<br>Chest CT: multilobar involvement<br>Complication: ARDS (ICU for 12 days) | ampicillin, sulbactam, clarithroycin, hydroxychloroquine<br><br>Hospitalization: 1<br>Intubation: 1<br>Discharge: 1<br>On supplementary oxygen at home |
| Sanchez-Nadales et al [93] / USA | 2020 | 22-year female with severe acute hypoxic respiratory failure<br><br>Coinfection: SARS-CoV-2 and HCoV NL63<br><br>Comorbidities: tubulointerstitial nephritis on steroids, HTN, DM | Nonproductive cough, Fever, chills, SOB<br>Complications: pulmonary embolism, acute kidney injury, pneumothorax, pneumomediastinum, multiple cardiac arrests                                           | 30 days ICU<br>Hospitalization: 1<br>Oxygen:<br>Intubation:<br>Death: 1                                                                                |
| Nascimento et al [94] / Brasil   | 2020 | 25-year-old male physician with COVID-19 and measles (serology positive IgM)<br><br>Comorbidities: asthma                                                                         | Prostration, fever, cough, odynophagia, anosmia, ageusia, face edema, rash, conjunctival hyperemia, tachypnea, desaturation                                                                            | azithromycin, prednisone<br>Supplementary oxygen<br><br>Favorable outcome                                                                              |
| Touzard-Romo et al [95] / USA    | 2020 | 57 y.o. female with SARS-CoV-2 and hMPV<br>Comorbidities: obstructive sleep apnea on continuous positive airway pressure, HTN, hyperlipidemia                                     | Dry cough, SOB, fever<br><br>CXR: no infiltrates                                                                                                                                                       | Albuterol inhaler, steroids<br>Hospitalization: 1<br>Oxygen: 0<br>Intubation: 0<br>Discharge: 1                                                        |

|                                   |                                   |                                                                                                                                                                                                                                                           |                                                                                                                                                                                             |                                                                                                                                                                     |
|-----------------------------------|-----------------------------------|-----------------------------------------------------------------------------------------------------------------------------------------------------------------------------------------------------------------------------------------------------------|---------------------------------------------------------------------------------------------------------------------------------------------------------------------------------------------|---------------------------------------------------------------------------------------------------------------------------------------------------------------------|
| Sohal et al [96] / USA            | 2020                              | 2 fatal cases with SARS-CoV-2 co-infection: a 40-year-old male with COVID 19 and parainfluenza and a 80-year-old female with COVID-10 and <i>Streptococcus pneumoniae</i><br>Comorbidities (1): DM, HTN, asthma, paroxysmal atrial fibrillation, dementia | Fever (2), cough (1), body aches (1), headache (1), SOB (1)                                                                                                                                 | Ceftriaxone (2), azithromycin (2), Hydroxychloroquine (1)<br><br>Hospitalization: 2<br>Intubation: 1<br>Death: 2                                                    |
| Danley et al [97] / USA           | March 26, 2020                    | 4-month-old boy coinfectd: adenovirus + COVID-19<br><br>Comorbidities: CHD                                                                                                                                                                                | Loose stools, stuffy nose, decreased oral intake, mild cough, diaphoresis, tachypnea, 91% oxygen saturation                                                                                 | No antibiotics<br><br>Hospitalization: 4 days<br>Oxygen: yes<br>Discharge                                                                                           |
| Jiang et al [98] / China          | December 1 2019 - January 16 2020 | Two children (both females, 6.5 years and 3.5 years):<br>1 <sup>st</sup> SARS-CoV-2, RSV, hMPV 2 <sup>nd</sup> SARS-CoV-2, hMPV, <i>M. pneumoniae</i>                                                                                                     | Fever, cough, vomiting, swollen pharynx                                                                                                                                                     | oseltamivir (1), glucocorticosteroids(1), antibiotics (2)<br><br>Hospitalization: 2<br>Oxygen: 2<br>ICU admission: 1<br>Discharge: 2                                |
| Kakuya et al [99] / Japan         | February 2020                     | 5-y.o. boy with COVID-19 and hMPV<br><br>11-y.o. boy with COVID-19 and influenza A (positive antigen)<br><br>No comorbidities                                                                                                                             | Cough, fever, decreased appetite<br><br>No complications                                                                                                                                    | ceftriaxone, peramivir<br>Hospitalization: 1<br>Oxygen: 0<br>Intubation: 0<br>Discharge: 1<br>Death: 0                                                              |
| Langerbeins et al [100] / Germany | 2020                              | 52-y.o. patient with SARS-CoV-2 and parainfluenza (Multiplex PCR)<br><br>Comorbidities: CLL, psoriasis, asthma                                                                                                                                            | Cough, ageusia, hyposmia<br>CT: bilateral GGOs                                                                                                                                              | hydrochloroquine, IVIG, piperacillin/tazobactam,<br><br>Admission to ICU<br>High flow oxygen via nasal cannula                                                      |
| Rodriguez et al [101] / USA       | 2020                              | 21-year-old male with severe pneumonia due to SARS-CoV-2 and parainfluenza virus<br><br>substance abuse, smoker<br>no reported medical history                                                                                                            | Fever, dry cough, dyspnea, myalgia, fatigue and diarrhea<br>Increased WBCs, CRP, ferritin, procalcitonin<br>CXR: bilateral opacities<br>CT: multiple bilateral opacities and bilateral GGOs | oseltamivir, azithromycin, ceftriaxone, lopinavir/ritonavir, hydroxychloroquine<br><br>Hospitalization: twice<br>Oxygen: 1<br>Intubation: 0<br>Outcome: improvement |



|                                     |                          |                                                                                                                                                                                                                                                                                                                                                                                                          |                                                                                                                                              |                                                                                                                                           |
|-------------------------------------|--------------------------|----------------------------------------------------------------------------------------------------------------------------------------------------------------------------------------------------------------------------------------------------------------------------------------------------------------------------------------------------------------------------------------------------------|----------------------------------------------------------------------------------------------------------------------------------------------|-------------------------------------------------------------------------------------------------------------------------------------------|
| Alharthy et al [102] / Saudi Arabia | 2020                     | 25-year-old male admitted to ICU with acute respiratory failure due to COVID-19<br>No comorbidities<br><br>hMPV by PCR                                                                                                                                                                                                                                                                                   | fever, dry cough, wheezing, chest pain, 75% oxygen saturation<br><br>lymphocytopenia, increased CRP<br>CXR: bilateral interstitial pneumonia | lopinavir/ritonavir, ribavirin, interferon beta-1b, dexamethasone<br><br>Hospitalization: 1<br>Oxygen: 1<br>Intubation: 0<br>Discharge: 1 |
| Scott et al [103] / USA             | March 2020-February 2021 | 53/745 valid COVID-19 specimens (7,1%) positive for $\geq 1$ pathogens:<br>Rhinovirus/enterovirus: 41.5%;<br>hMPV: 33.9%; adenovirus: 22.6%<br>No influenza A or B<br>Median age of co-infected patients: 38 years<br>53% males, 47% females<br>Coinfections were more common in children $\leq 9$ y.o.<br>In children $\leq 9$ y.o. mainly hMPV, adenovirus, RSV, bocavirus, and rhinovirus/enterovirus | NA                                                                                                                                           | NA                                                                                                                                        |

SARS-CoV-2: severe acute respiratory syndrome coronavirus 2; USA: United States of America; y.o.: years old; NA: not available; PCR: polymerase chain reaction; RSV: respiratory syncytial virus; hMPV: human metapneumovirus; c/w: compared with; COVID-19: coronavirus disease 2019; vs: versus; SOB: shortness of breath; LRTIs: lower respiratory tract infections; ICU: intensive care unit; ECMO: extracorporeal membrane oxygenation; CAP: community-acquired pneumonia; CRP: C-reactive protein; HTN: hypertension; CXR: chest-X-ray; DM: diabetes mellitus; *M. pneumoniae*: *Mycoplasma pneumoniae*; *C. pneumoniae*: *Chlamydia pneumoniae*; CT: computer tomography; GGOs: ground glass opacities; CVD: cardiovascular disease; WBCs: white blood cells; *K. oxytoca*: *Klebsiella oxytoca*; ARDS: acute respiratory distress syndrome; CHD: chronic heart disease; IVIG: intravenous immune globulin; CLL: chronic lymphocytic leukemia
